# Supplementary material for: IL-33 Promotes CD11b/CD18-Mediated Adhesion of Eosinophils to Cancer Cells and Synapse-Polarized Degranulation Leading to Tumor Cell Killing
Source: MDPI journal article supplement (doi:10.3390/cancers11111664), 2019-10-26
Supplement: s1 [file s1]

## Supplementary Video Legends

**Video 1.** Video recording of IL-5 EO co-cultured with B16 tumor cells. The video (200 × 200 micron crop) shows tracks of IL-5 EO moving nearby a tumor cell (5 h time lapse). Colored lines depict tracks of IL-5 EO paths. Adherent cell in the middle of the field represents a B16 tumor cell.

**Video 2.** Video recording of IL-33 EO co-cultured with B16 tumor cells. The video (200 × 200 micron crop) shows tracks of IL-33 EO moving nearby a tumor cell (5 h time lapse). Colored lines depict tracks of IL-33 EO paths. Adherent cell in the middle of the field represents a B16 tumor cell.

**Video 3.** Video recording of IL-5 EO co-cultured with TC-1 tumor cells. The video (200 × 200 micron crop) shows tracks of IL-5 EO moving nearby a tumor cell (5 h time lapse). Colored lines depict tracks of IL-5 EO paths. Adherent cell in the middle of the field represents a TC-1 tumor cell.

**Video 4.** Video recording of IL-33 EO co-cultured with TC-1 tumor cells. The video (200 × 200 micron crop) shows tracks of IL-33 EO moving nearby a tumor cell (5 h time lapse). Colored lines depict tracks of IL-33 EO paths. Adherent cell in the middle of the field represents a TC-1 tumor cell.
